# Supplementary material for: Serum levels of apolipoprotein A-I and high-density lipoprotein can predict organ failure in acute pancreatitis
Source: PubMed Central journal article supplement (PMC4363356; doi:10.1186/s13054-015-0832-x), 2015-03-17
Supplement: 13054_2015_832_MOESM1_ESM.pdf [file 13054_2015_832_MOESM1_ESM.pdf]

Table S1 Pair-wise comparisons of AUROC for HDL, APO A-I and scores to predict persistent organ failure

| Parameter               | AUROC (95% CI )     | SE    | P-value <sup>a</sup> | P-value <sup>b</sup> |
|-------------------------|---------------------|-------|----------------------|----------------------|
| HDL                     | 0.912 (0.842-0.982) | 0.036 | -                    | 0.671                |
| APO A -I                | 0.898 (0.813-0.983) | 0.043 | 0.671                | -                    |
| Ranson's score          | 0.798 (0.674-0.891) | 0.058 | 0.067                | 0.125                |
| APACH II score          | 0.813 (0.691-0.902) | 0.057 | 0.098                | 0.188                |
| SOFA score              | 0.868 (0.755-0.941) | 0.046 | 0.369                | 0.595                |
| Modified Marshall score | 0.934 (0.838-0.982) | 0.030 | 0.652                | 0.499                |

<sup>a</sup>P values are given relative to the HDL

<sup>b</sup>P values are given relative to the APO A-I

Abbreviation: HDL, high-density lipoprotein; APO A-I, apolipoprotein I; APACHE, Acute Physiology, Age, and Chronic Health Evaluation; SOFA, sequential organ failure assessment; AUROC, area under a receiver operating characteristic; SE, standard error
